# Supplementary material
Source: PubMed Central journal article supplement (PMC2772486)
Supplement: supp_191_22_7109__1.pdf [file supp_191_22_7109__1.pdf]

## SUPPLEMENTAL FIGURE LEGENDS

**Suppl. Fig. 1.** Restriction maps showing the construction and structure of the gene inactivation plasmids as well as the relative positions of PCR primers used for verification of segregation.

**Suppl. Fig. 2.** Absorption spectra of whole cells of the wild type (solid line) and the mutants lacking proteins of the CsmC/CsmD or CsmB/CsmF motif families (dashed lines). Spectra were recorded for cell suspensions at  $OD_{600\text{ nm}} = 0.1$  to  $0.2$  and were normalized to  $OD_{600\text{ nm}} = 1$ . All cells were grown at a light intensity of  $30\ \mu\text{mol photons m}^{-2}\ \text{s}^{-1}$  to late exponential phase. Panel A, wild type and the *csmC csmD* mutant; Panel B, wild type and the *csmC csmED* mutant; Panel C, wild type and the *csmC csmD csmH* mutant; Panel D, wild type and the *csmC csmED csmH* mutant; Panel E, wild type and the *csmB csmF* mutant; Panel F, wild type and the *csmB csmF csmH* mutant.

**Suppl. Fig. 3.** Chlorosome isolation from the *csmB csmF* and *csmC csmD csmH* mutants. Chlorosome were isolated by ultracentrifugation on the 7-47% (w/v) linear sucrose gradients in chlorosome isolation buffer (For other details, see Materials and Methods). Gradient 1: wild type; gradient 2: *csmB csmF* mutant; gradient 3: *csmC csmD csmH* mutant. Chl, chlorosomes; fr2, fraction-2 (for a description of fraction-2, see text).

Suppl. Fig. 1

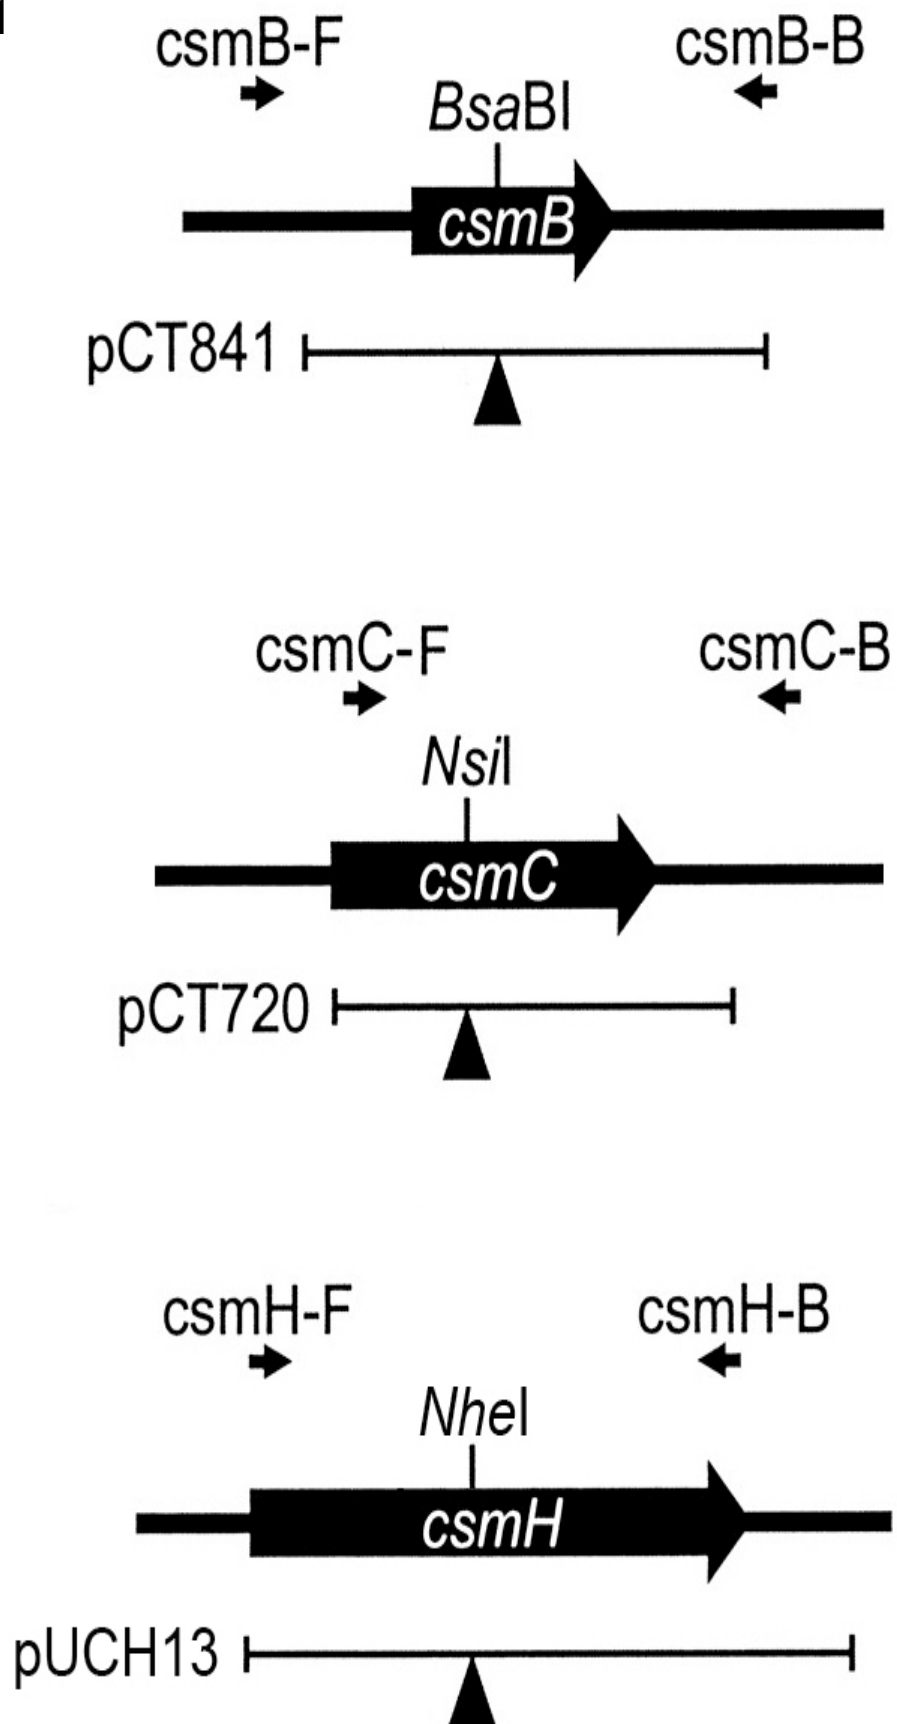

# Suppl. Fig. 2

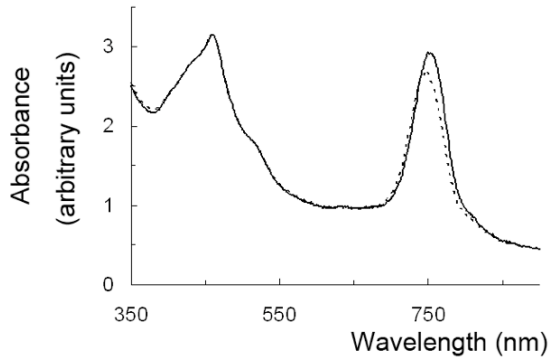

**A**

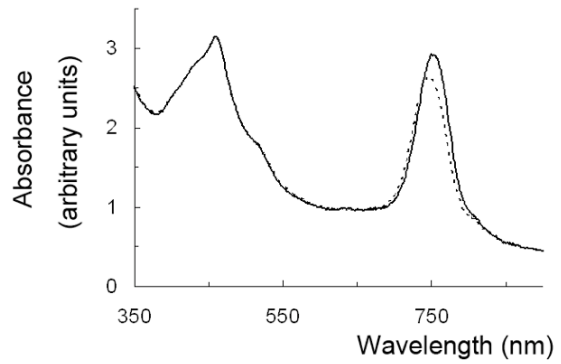

**B**

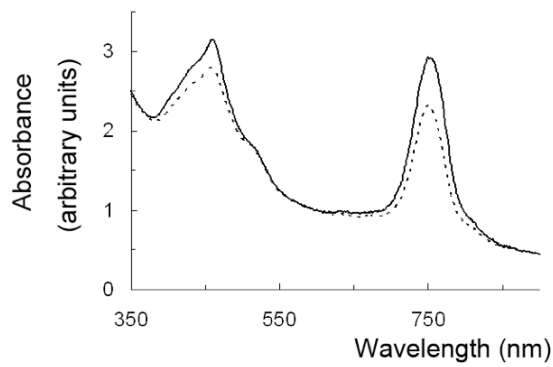

**C**

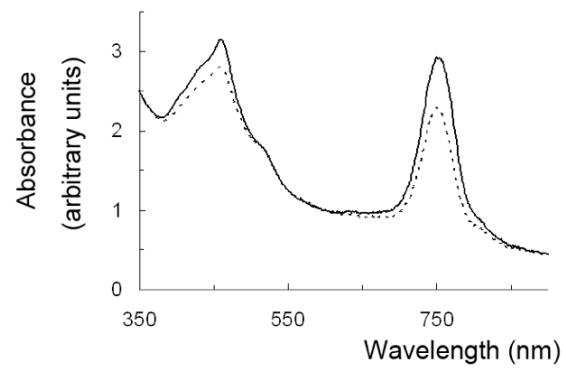

**D**

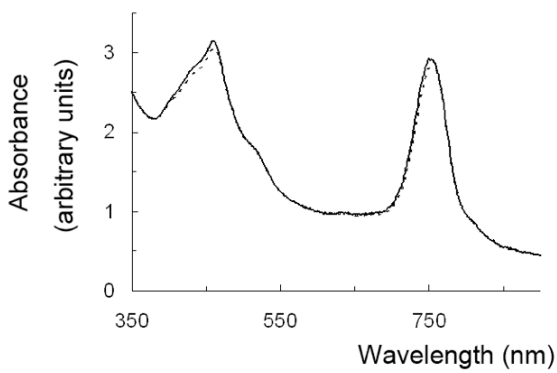

**E**

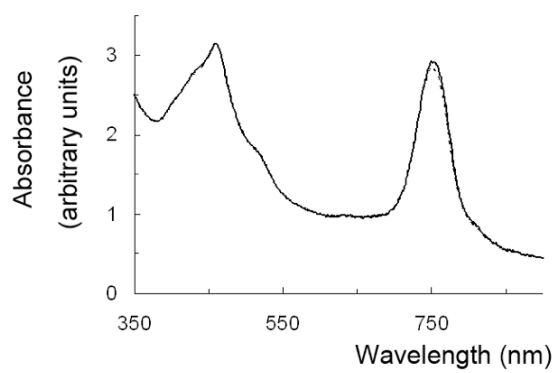

**F**

Suppl. Fig. 3

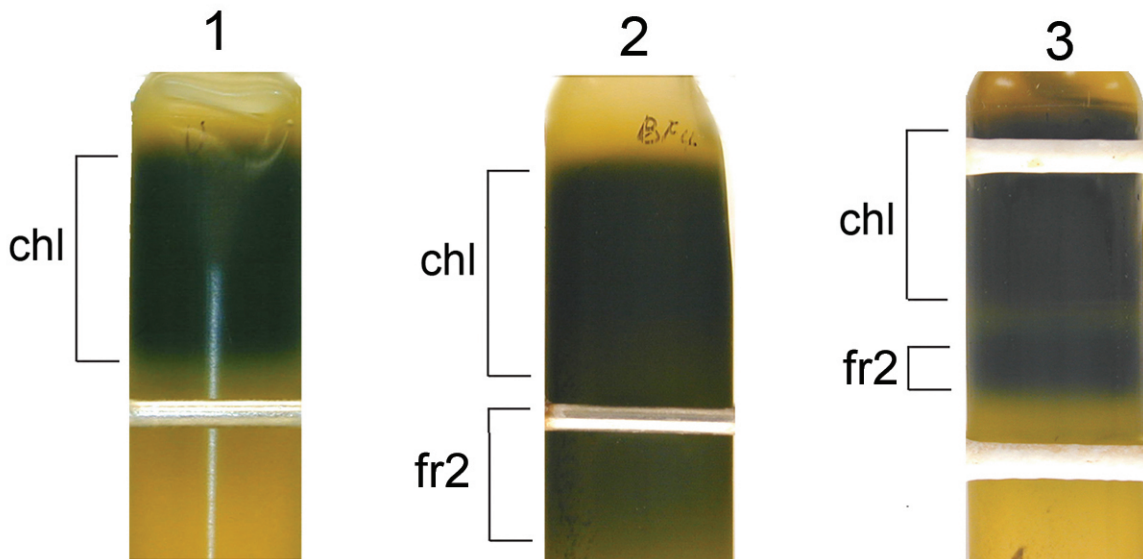

**Suppl. Table 1.** Characterization of chlorosomes isolated from the wild type and mutants lacking the proteins of the CsmC/CsmD or CsmB/CsmF motif families.<sup>a, b</sup>

| Strain                    | Absorption maximum (nm) | Fluorescence maximum <sup>c</sup> (nm) | BChl <i>a</i> | Carotenoids | Mena-quinone-7 | Chlorobium-quinone | Total quinones |
|---------------------------|-------------------------|----------------------------------------|---------------|-------------|----------------|--------------------|----------------|
| Wild type                 | 750 ± 1                 | 771 ± 1                                | 11 ± 1        | 57 ± 2      | 14 ± 2         | 48 ± 4             | 62 ± 6         |
| <i>csmC csmD</i>          | 737 ± 1                 | 765 ± 2                                | 10 ± 1        | 53 ± 6      | 14 ± 4         | 52 ± 10            | 66 ± 14        |
| <i>csmC csmED</i>         | 738 ± 2                 | 767 ± 1                                | 8 ± 0         | 45 ± 2      | 19 ± 1         | 47 ± 2             | 66 ± 3         |
| <i>csmC csmD csmH</i>     | 745 ± 1                 | 768 ± 1                                | 14 ± 2        | 79 ± 2      | 29 ± 7         | 55 ± 5             | 84 ± 12        |
| <i>csmC csmED csmH</i>    | 745 ± 2                 | 769 ± 1                                | 15 ± 1        | 71 ± 3      | 26 ± 5         | 61 ± 4             | 87 ± 9         |
| <i>csmC csmD csmH</i> Fr2 | 732 ± 3                 | 765 ± 1                                | 17 ± 2        | 78 ± 27     | 29 ± 1         | 45 ± 5             | 74 ± 6         |
| <i>csmB csmF</i>          | 756 ± 2                 | 773 ± 1                                | 12 ± 1        | 42 ± 1      | 13 ± 2         | 44 ± 5             | 57 ± 7         |
| <i>csmB csmF csmH</i>     | 753 ± 3                 | 773 ± 1                                | 12 ± 1        | 43 ± 0      | 14 ± 1         | 47 ± 1             | 61 ± 2         |
| <i>csmB csmF</i> Fr2      | 754 ± 3                 | 773 ± 1                                | 57            | 64          | 14             | 59                 | 73             |

<sup>a</sup>Pigment and quinone contents are reported as mg per g of BChl *c*.

<sup>b</sup>The reported values (mean and standard deviations) are the results from at least two measurements except for the fraction-2 sample from the *csmB csmF* mutant, which shows the results from a single preparation.

<sup>c</sup>Fluorescence emission spectra were taken under reducing conditions in the presence of 10 mM sodium dithionite.
